# Supplementary material for: The oxidative potential of fresh and aged elemental carbon-containing airborne particles: a review
Source: Royal Society of Chemistry journal article supplement (doi:10.1039/d1em00497b), 2022-01-01
Supplement: d1em00497b1.pdf [file d1em00497b1.pdf]

*Supporting information for*  
**The Oxidative Potential of Fresh and Aged Elemental  
Carbon-containing Airborne Particles: A Review**

Yangyang Liu and Chak K. Chan \*

\*Corresponding Author: Chak K. Chan

E-mail: [chak.k.chan@cityu.edu.hk](mailto:chak.k.chan@cityu.edu.hk)\*

School of Energy and Environment, City University of Hong Kong, Tat Chee Avenue,  
Kowloon, Hong Kong, China

**Supplementary Text 1: The most popular DTT-based protocols for determining the OP of ECCAPs in cited references in this article.**

Since metal ions can trigger the decay of DTT chemical reagents, metal chelators Chelex (Cho's protocol, PA) and EDTA (Li's protocol, PB) were initially added into the buffering extraction solution to capture the metal ions before the incubation stage. An apparent difference between those two approaches is that Cho et al. employed trichloroacetic acid (TCA) to terminate the DTT consumption and then injected DTNB to convert the remaining DTT to form 2-nitro-5-thiobenzoic (TNB), which has a large absorption coefficient ( $14,150 \text{ M}^{-1} \text{ cm}^{-1}$ ) at  $412 \text{ nm}$ <sup>1, 2</sup>. Without using TCA before adding DTNB and they reported that the absorbance of TNB is stable within 2 h due to fast interactions between DTT and DTNB<sup>3</sup>. Therefore, Cho's DTT-based protocol for determining OP brings fewer uncertainties when the number of samples is large and the stock solution (without TCA) needs to be kept for a relatively long time before measurement. While some studies have slight modifications in the extraction solvent, incubation conditions, and the sequence of adding chemical reagents, etc., they almost follow the sequence of single extraction procedure using  $\text{H}_3\text{PO}_4$  buffering solution (pH=7.3 or 7.4), incubation at  $37 \text{ }^\circ\text{C}$  (physiologically relevant temperature), and final spectroscopic UV-VIS measurements of 2-nitro-5-thiobenzoic (TNB) at the wavelength of  $412 \text{ nm}$ . There are also improved methodologies to more precisely capture the overall OP of ECCAPs such as employing multiple extraction procedures containing water, methanol, and dichloromethane (DCM) in the specific orders<sup>4</sup>, using high extraction efficiency of Teflon filters in ultrasonic bath<sup>5</sup>, the use of more realistic solvent proxy of simulated lung fluid (SLF) to mimic biological tissue environment<sup>6</sup>, which take both chemical redox and bioaccessibility into consideration<sup>7</sup>.

**Table S1. Glossary and Abbreviation Description**

| Abbreviation                      | Full Name and Description                                                                                          |
|-----------------------------------|--------------------------------------------------------------------------------------------------------------------|
| 1,2-NQ                            | 1,2-naphthoquinone                                                                                                 |
| 1,4-NQ                            | 1,4-naphthoquinone                                                                                                 |
| BAA                               | Benz(a)anthracene                                                                                                  |
| BD                                | 1,1'-biphenyl-2,2'-dicarboxaldehyde                                                                                |
| CRY                               | Chrysene                                                                                                           |
| DEP                               | Diesel Exhaust Particles                                                                                           |
| DPF                               | Diesel Particle Filter                                                                                             |
| Fresh UBC with 14 nm average size | UBC-Fresh (14 nm)                                                                                                  |
| FS101                             | Commercial Black Carbon Proxy FS101                                                                                |
| FW2                               | Commercial Black Carbon Proxy FW2                                                                                  |
| Lab Soot(H)                       | Lab-produced Soot using Hexane as fuel                                                                             |
| Lab Soot(M)                       | Lab-produced Soot using Methanol as fuel                                                                           |
| Lab Soot(P)                       | Lab-produced Soot using Propane as fuel                                                                            |
| Lab Soot(P)-Bz[e]p+Ozone          | Lab Soot(P)-Coated with benzo[e]pyrene                                                                             |
| LGEC                              | Lab-generated Elemental Carbon                                                                                     |
| NAP                               | Naphthalene                                                                                                        |
| A/F                               | Air/Fuel                                                                                                           |
| PHE                               | Phenanthrene                                                                                                       |
| PQ                                | Phenanthrenequinone                                                                                                |
| Printex 90                        | Commercial Black Carbon Proxy Printex                                                                              |
| PYR                               | Pyrene                                                                                                             |
| SB4A                              | Special Black 4A                                                                                                   |
| SB4A-Benzoquinone                 | SB4A-Coated with Benzoquinone                                                                                      |
| SOA                               | Secondary Organic Aerosol                                                                                          |
| SRM 2975                          | Commercial Diesel PM (SRM 2975)                                                                                    |
| SWCNTs                            | Single-Walled Carbon Nanotubes                                                                                     |
| SWCNTs-Benzoquinone               | SWCNTs-Coated with Benzoquinone                                                                                    |
| SWCNTs-COOH                       | SWCNTs functionalized by COOH groups                                                                               |
| SWCNTs-OH                         | SWCNTs functionalized by OH groups                                                                                 |
| Synthetic Air                     | Synthetic air with sulfur dioxide, nitrogen dioxide, ozone concentration levels comparable to those in ambient air |
| UBC                               | Printex U Black Carbon                                                                                             |
| UBC(Ozone)+Sulfur Dioxide         | UBC treated with ozone and then sulfur dioxide                                                                     |
| UBC-1,4-NQ                        | UBC-Coated with 1,4-NQ                                                                                             |
| UBC-Benzoquinone                  | UBC-Coated with Benzoquinone                                                                                       |
| UBC-Sulfate                       | UBC-Coated with Sulfate                                                                                            |
| UD                                | Ultrasonic Dispersion                                                                                              |
| Vis                               | Visible Light Irradiation                                                                                          |
| WIOC                              | Water Insoluble Organic Carbon                                                                                     |



**Table S2. Summary of the Aging Conditions conducted for ECCAPs considered in the review article**

| ECCAPs Types                                         | Conditions  | Features                                                                                                                                        | Ref. |
|------------------------------------------------------|-------------|-------------------------------------------------------------------------------------------------------------------------------------------------|------|
| Laboratory-produced Soot (propane)-Air/Fuel (8.83)   | Aging-1     | 150 ± 30 ppb of O <sub>3</sub>                                                                                                                  | 8    |
|                                                      | Aging-2     | Air+ Visible light (480-680 nm)                                                                                                                 |      |
|                                                      | Aging-3     | 150 ± 30 ppb of O <sub>3</sub> + Visible light (480-680 nm)                                                                                     |      |
| Laboratory-produced Soot (propane)-Air /Fuel (11.77) | Aging-1     | 150 ± 30 ppb of O <sub>3</sub>                                                                                                                  | 8    |
|                                                      | Aging-2     | Air+ Visible light (480-680 nm)                                                                                                                 |      |
|                                                      | Aging-3     | 150 ± 30 ppb of O <sub>3</sub> + Visible light (480-680 nm)                                                                                     |      |
| Printex U black carbon (UBC)                         | Aging-1     | 100 ppm of O <sub>3</sub> + UV (185 nm)                                                                                                         | 9    |
| Laboratory-produced Soot(n-hexane)                   | Aging-1     | 100 ppm of O <sub>3</sub> + UV (185 nm)                                                                                                         |      |
| Diesel Soot                                          | Aging-1     | 100 ppm of O <sub>3</sub> + UV (185 nm)                                                                                                         |      |
| Graphite                                             | Aging-1     | 100 ppm of O <sub>3</sub> + UV (185 nm)                                                                                                         |      |
| Laboratory-produced Soot (propane)-Air/Fuel (8.83)   | Aging-1     | 150 ± 30 ppb of O <sub>3</sub>                                                                                                                  | 10   |
| Laboratory-produced Soot (propane)-Air /Fuel (11.77) | Aging-1     | 150 ± 30 ppb of O <sub>3</sub>                                                                                                                  |      |
| Printex U black carbon (UBC)                         | Aging-1     | Ozonized UBC (64 mg m <sup>-3</sup> , 2 hr) + SO <sub>2</sub> (86 mg m <sup>-3</sup> , synthetic air dilution), RH = 40%)- Short Exposure (1 h) | 11   |
|                                                      | Aging-2     | Ozonized UBC (64 mg m <sup>-3</sup> , 2 hr) + SO <sub>2</sub> (86 mg m <sup>-3</sup> , synthetic air dilution), RH = 40%)- Long Exposure (6 h)  |      |
| Printex U black carbon (UBC)                         | Aging-1 (2) | <sup>a</sup> Ambient Air (Synthetic Air)                                                                                                        | 12   |

|                                                        |         |                                                                                                                                   |    |
|--------------------------------------------------------|---------|-----------------------------------------------------------------------------------------------------------------------------------|----|
| SWCNTs                                                 |         |                                                                                                                                   |    |
| Hexane soot                                            |         |                                                                                                                                   |    |
| Special Black 4A (SB4A)                                |         |                                                                                                                                   |    |
|                                                        | Aging-3 | <sup>b</sup> OA/organic Vapors                                                                                                    |    |
|                                                        | Aging-4 | <sup>c</sup> NO <sub>2</sub>                                                                                                      |    |
|                                                        | Aging-5 | Zero Air                                                                                                                          |    |
|                                                        | Aging-6 | <sup>c</sup> SO <sub>2</sub>                                                                                                      |    |
|                                                        | Aging-7 | Toluene                                                                                                                           |    |
| Laboratory-produced Soot (methane)- Oxygen/Fuel (3.02) | Aging-1 | 28 ppm of O <sub>3</sub>                                                                                                          | 13 |
| Printex U black carbon (UBC)                           | Aging-1 | 100 ppm of O <sub>3</sub> , 2h                                                                                                    | 14 |
| SWCNTs                                                 | Aging-1 | (37 ± 3) % of RH, 30 ppb of O <sub>3</sub> exposure, 1-7 days                                                                     | 15 |
|                                                        | Aging-2 | (37 ± 3) % of RH, (0–1.1 × 10 <sup>11</sup> molecules cm <sup>-3</sup> of ·OH exposure, 1–7 days equivalent ambient exposure      |    |
| Lab Soot (Propane)                                     | Aging-1 | <sup>d</sup> 1.1×10 <sup>12</sup> -1.0×10 <sup>13</sup> molecule cm <sup>-3</sup> h of O <sub>3</sub>                             | 16 |
|                                                        | Aging-2 | <sup>d</sup> 1.0×10 <sup>13</sup> -1.3×10 <sup>13</sup> molecule cm <sup>-3</sup> h of O <sub>3</sub>                             |    |
|                                                        | Aging-3 | <sup>d</sup> 1.3×10 <sup>13</sup> -1.0×10 <sup>14</sup> molecule cm <sup>-3</sup> h of O <sub>3</sub>                             |    |
|                                                        | Aging-4 | <sup>d</sup> Coated with benzo[e]pyrene, 1.1×10 <sup>12</sup> -1.0×10 <sup>13</sup> molecule cm <sup>-3</sup> h of O <sub>3</sub> |    |
|                                                        | Aging-5 | <sup>d</sup> Coated with benzo[e]pyrene, 1.0×10 <sup>12</sup> -1.3×10 <sup>13</sup> molecule cm <sup>-3</sup> h of O <sub>3</sub> |    |
|                                                        | Aging-6 | <sup>d</sup> Coated with benzo[e]pyrene, 1.3×10 <sup>13</sup> -1.0×10 <sup>14</sup> molecule cm <sup>-3</sup> h of O <sub>3</sub> |    |

<sup>a</sup>Aging process 1 exposes black carbon particles to ambient air. Aging process 2 exposes black carbon to synthetic air that contains O<sub>3</sub>, SO<sub>2</sub>, and NO<sub>2</sub> at concentrations comparable to that found in the ambient air.

<sup>b</sup>The OA-containing air is derived from the oxidation of toluene (about 60 ppb) by OH (produced by photolysis of H<sub>2</sub>O<sub>2</sub>).

<sup>c</sup>The flow rate in the cylinders reaches a total flow of 2.0 L min<sup>-1</sup> (76 mL min<sup>-1</sup> for 1.44 × 10<sup>3</sup> µg m<sup>-3</sup> SO<sub>2</sub>, 5 mL min<sup>-1</sup> for 1.04 × 10<sup>3</sup>

$\mu\text{g m}^{-3}$   $\text{NO}_2$ , balanced with zero air).

<sup>d</sup>DTT measurement results of Lab Soot (Propane) upon  $\text{O}_3$  exposure of  $1.1 \times 10^{12}$ - $1.0 \times 10^{14}$  molecule  $\text{cm}^{-3}$  h were divided into three regimes and their values were averaged accordingly.

## Reference:

1. H. H. Jiang, C. M. S. Ahmed, A. Canchola, J. Y. Chen and Y. H. Lin, Use of Dithiothreitol Assay to Evaluate the Oxidative Potential of Atmospheric Aerosols, *Atmosphere-Basel*, 2019, **10**, DOI: 10.3390/atmos10100571.
2. K. E. Berg, L. R. Turner, M. L. Benka-Coker, S. Rajkumar, B. N. Young, J. L. Peel, M. L. Clark, J. Volckens and C. S. Henry, Electrochemical dithiothreitol assay for large-scale particulate matter studies, *Aerosol Science and Technology*, 2019, **53**, 268-275, DOI: 10.1080/02786826.2018.1560391.
3. M. F. Lin and J. Z. Yu, Dithiothreitol (DTT) concentration effect and its implications on the applicability of DTT assay to evaluate the oxidative potential of atmospheric aerosol samples, *Environ. Pollut.*, 2019, **251**, 938-944, DOI: 10.1016/j.envpol.2019.05.074.
4. D. Gao, T. Fang, V. Verma, L. Zeng and R. J. Weber, A method for measuring total aerosol oxidative potential (OP) with the dithiothreitol (DTT) assay and comparisons between an urban and roadside site of water-soluble and total OP, *Atmos. Meas. Tech.*, 2017, **10**, 2821-2835, DOI: 10.5194/amt-10-2821-2017.
5. A. Yang, A. Jedynska, B. Hellack, I. Rooter, G. Hoek, B. Brunekreef, T. A. J. Kuhlbusch, F. R. Cassee and N. A. H. Janssen, Measurement of the oxidative potential of PM<sub>2.5</sub> and its constituents: The effect of extraction solvent and filter type, *Atmos. Environ.*, 2014, **83**, 35-42, DOI: 10.1016/j.atmosenv.2013.10.049.
6. A. Calas, G. Uzu, F. J. Kelly, S. Houdier, J. M. F. Martins, F. Thomas, F. Molton, A. Charron, C. Dunster, A. Oliete, V. Jacob, J. L. Besombes, F. Chevrier and J. L. Jaffrezo, Comparison between five acellular oxidative potential measurement assays performed with detailed chemistry on PM<sub>10</sub> samples from the city of Chamonix (France), *Atmos. Chem. Phys.*, 2018, **18**, 7863-7875, DOI: 10.5194/acp-18-7863-2018.
7. M. Song, S. H. Oh, C. Park and M. S. Bae, Review: Analytical Procedure for Dithiothreitol-based Oxidative Potential of PM<sub>2.5</sub>, *Asian J. Atmos. Environ.*, 2021, **15**, 106-118, DOI: 10.5572/ajae.2021.015.
8. J. L. Zhu, J. Shang, Y. Y. Chen, Y. Kuang and T. Zhu, Reactive Oxygen Species-Related Inside-to-Outside Oxidation of Soot Particles Triggered by Visible-Light Irradiation: Physicochemical Property Changes and Oxidative Potential Enhancement, *Environ. Sci. Technol.*, 2020, **54**, 8558-8567, DOI: 10.1021/acs.est.0c01150.
9. Q. Li, J. Shang and T. Zhu, Physicochemical characteristics and toxic effects of ozone-oxidized black carbon particles, *Atmos. Environ.*, 2013, **81**, 68-75, DOI: 10.1016/j.atmosenv.2013.08.043.
10. J. L. Zhu, Y. Y. Chen, J. Shang, Y. Kuang and T. Zhu, Dithiothreitol (DTT) activity of different fractions of fresh and ozonised soot and quantitative contributions of ozonised products of phenanthrene, *Atmos. Environ.*, 2019, **214**, DOI: 10.1016/j.atmosenv.2019.116835.
11. W. W. Xu, Q. Li, J. Shang, J. Liu, X. Feng and T. Zhu, Heterogeneous oxidation of SO<sub>2</sub> by O<sub>3</sub>-aged black carbon and its dithiothreitol oxidative potential, *J. Environ. Sci. China*, 2015, **36**, 56-62, DOI: 10.1016/j.jes.2015.02.014.
12. H. T. Jiang, Y. C. Liu, Y. Xie, J. Liu, T. Z. Chen, Q. X. Ma and H. He, Oxidation Potential Reduction of Carbon Nanomaterials during Atmospheric-Relevant Aging: Role of Surface Coating, *Environ. Sci. Technol.*, 2019, **53**, 10454-10461, DOI: 10.1021/acs.est.9b02062.
13. A. L. Holder, B. J. Carter, R. Goth-Goldstein, D. Lucas and C. P. Koshland, Increased cytotoxicity of oxidized flame soot, *Atmos. Pollut. Res.*, 2012, **3**, 25-31, DOI: 10.5094/Apr.2012.001.



14. Q. Li, J. Shang, J. Liu, W. Xu, X. Feng, R. Li and T. Zhu, Physicochemical characteristics, oxidative capacities and cytotoxicities of sulfate-coated, 1,4-NQ-coated and ozone-aged black carbon particles, *Atmos. Res.*, 2015, **153**, 535-542, DOI: 10.1016/j.atmosres.2014.10.005.
15. Y. C. Liu, J. Liggio, S. M. Li, D. Breznan, R. Vincent, E. M. Thomson, P. Kumarathasan, D. Das, J. Abbatt, M. Antinolo and L. Russell, Chemical and Toxicological Evolution of Carbon Nanotubes During Atmospherically Relevant Aging Processes, *Environ. Sci. Technol.*, 2015, **49**, 2806-2814, DOI: 10.1021/es505298d.
16. M. Antinolo, M. D. Willis, S. M. Zhou and J. P. D. Abbatt, Connecting the oxidation of soot to its redox cycling abilities, *Nat. Commun.*, 2015, **6**, DOI: 10.1038/Ncomms7812.
